# Supplementary material
Source: publisher figshare collection journal article supplement (https://acs.figshare.com/ndownloader/files/6219750)
Supplement: Supplementary file 1 [file 6219750]

## **SUPPORTING INFORMATION**

### **Pin-based flow injection electroanalysis**

Estefanía C. Rama, Agustín Costa-García, M. Teresa Fernández-Abedul\*

Departamento de Química Física y Analítica, Universidad de Oviedo, Julián  
Clavería 8, 33006, Oviedo (Spain)

\*e-mail: mtfernandeza@uniovi.es

#### **Contents**

- **Scheme of saturated calomel electrode**
- **Scheme of enzymatic reactions**
- **Evaluation of the noise at the baseline**
- **Cost analysis**
- **Cyclic voltammogram of ferrocyanide**
- **Zoomed diagrams for different concentrations of glucose**

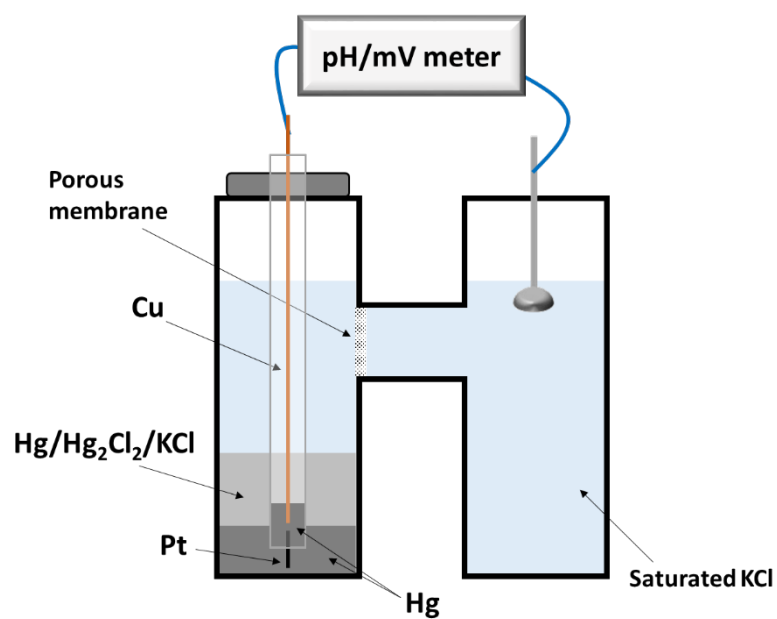

**Figure S1.** Scheme of the saturated calomel electrode.

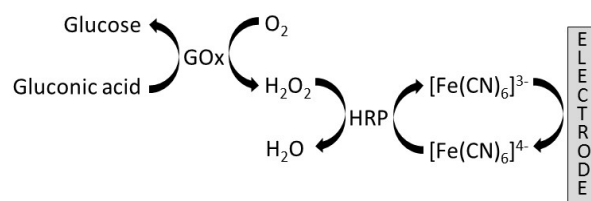

**Figure S2.** Scheme of the enzymatic reactions involved in glucose determination.

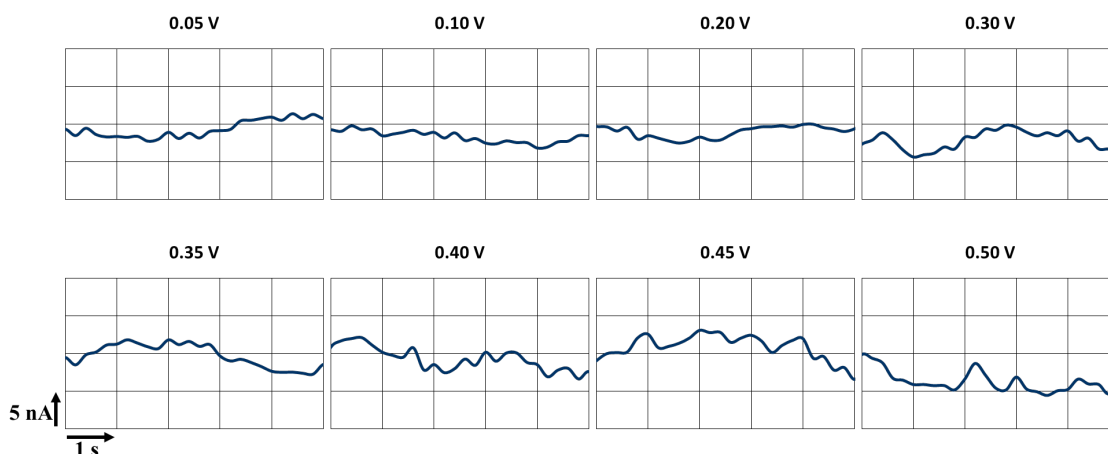

**Figure S3.** Baseline for different detection potentials vs. stainless-steel pseudoreference electrode.

## COST ANALYSIS

Table S1 shows a brief analysis of cost for each three-pin system. Excluding labour and capital expenses, and the cost of the conventional instrumentation of a FIA system, the cost of preparing the final system is \$0.28. To note, each system is able to perform more than 300 measurements. Moreover, the prices here considered were supplied in research quantities, but all of the materials and reagents are cheaper if they are purchased in bigger quantities.

**Table S1.** Cost of fabrication for each three-pin analytical system.

| Item                                  | Cost             | Cost for system / \$ |
|---------------------------------------|------------------|----------------------|
| Pins                                  | \$3.5 / 400 pins | < 0.027              |
| Carbon ink                            | \$32 / 50 g      | < 0.049              |
| DMF                                   | \$96 / L         | < 0.006              |
| Isopropyl alcohol                     | \$100 / L        | < 0.015              |
| Tubing                                | < \$30 / 10 m    | < 0.18               |
| Total cost for system with three pins |                  | < 0.28               |

## CYCLIC VOLTAMMOGRAM OF FERROCYANIDE

In order to determine anodic and cathodic peak potentials (vs. a stainless-steel pseudoreference electrode) for the ferro/ferri system and to set the most adequate potential for recording the diagrams for glucose determination in the FIA system, a cyclic voltammogram was recorded in a 1.0 mM ferrocyanide solution in 0.1 M phosphate buffer of pH 7.0 (Figure S4). This was made using an electrochemical cell constructed by drilling the pins in a transparency sheet as is detailed in our previous work of pin-based biosensors<sup>24</sup>. The cyclic voltammogram (i-E curve) was recorded by dropping a 70- $\mu$ L aliquot of a ferrocyanide solution covering all the three pins. The potential was scanned between -0.2 and 0.7 V at 50  $\text{mV}\cdot\text{s}^{-1}$ . A well-defined process is observed with a formal potential of 213 mV.

A -0.1 V potential was chosen for recording the analytical signal in the FIA system since this potential is low enough to assure the electrochemical reduction of ferricyanide.

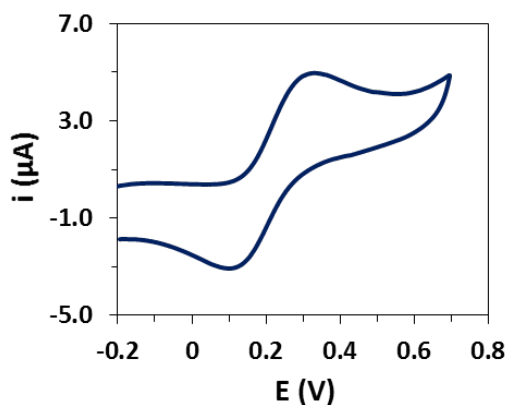

**Figure S4.** Cyclic voltammogram recorded in a 1 mM ferrocyanide solution in 0.1 M phosphate buffer pH 7.0 at a scan rate of 50  $\text{mV}\cdot\text{s}^{-1}$  in an electrochemical cell that uses a pin coated with carbon ink as working electrode and two bare pins as counter and reference electrodes.

## ZOOMED FIAGRAMS

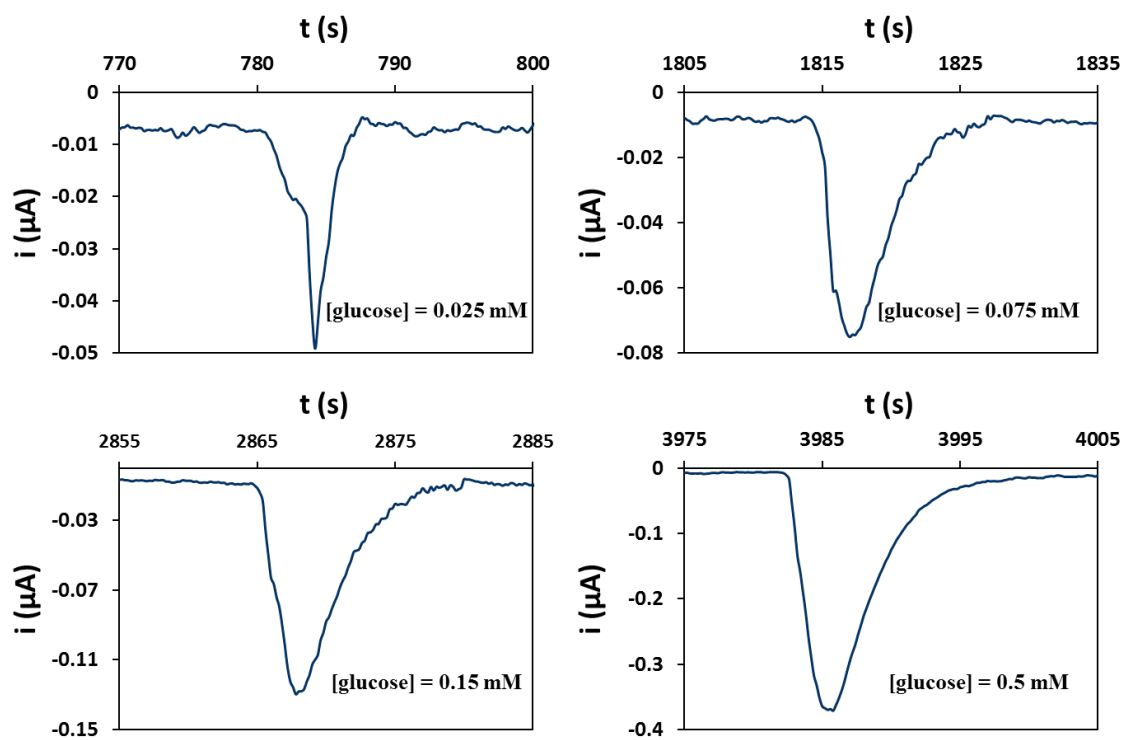

**Figure S5.** Zoomed fiagrams ( $i$  vs.  $t$ ) recorded for different concentrations of glucose (0.025, 0.075, 0.150 and 0.500 mM) applying a potential of -0.1 V vs. a stainless-steel pseudoreference electrode and a  $1.5 \text{ mL} \cdot \text{min}^{-1}$  of flow rate.
